# Supplementary material
Source: PubMed Central journal article supplement (PMC4380842)

**A**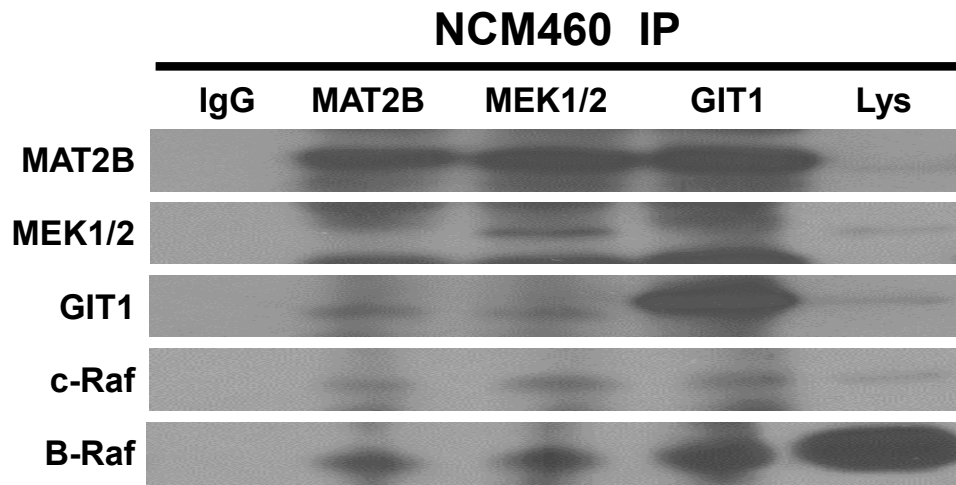**B**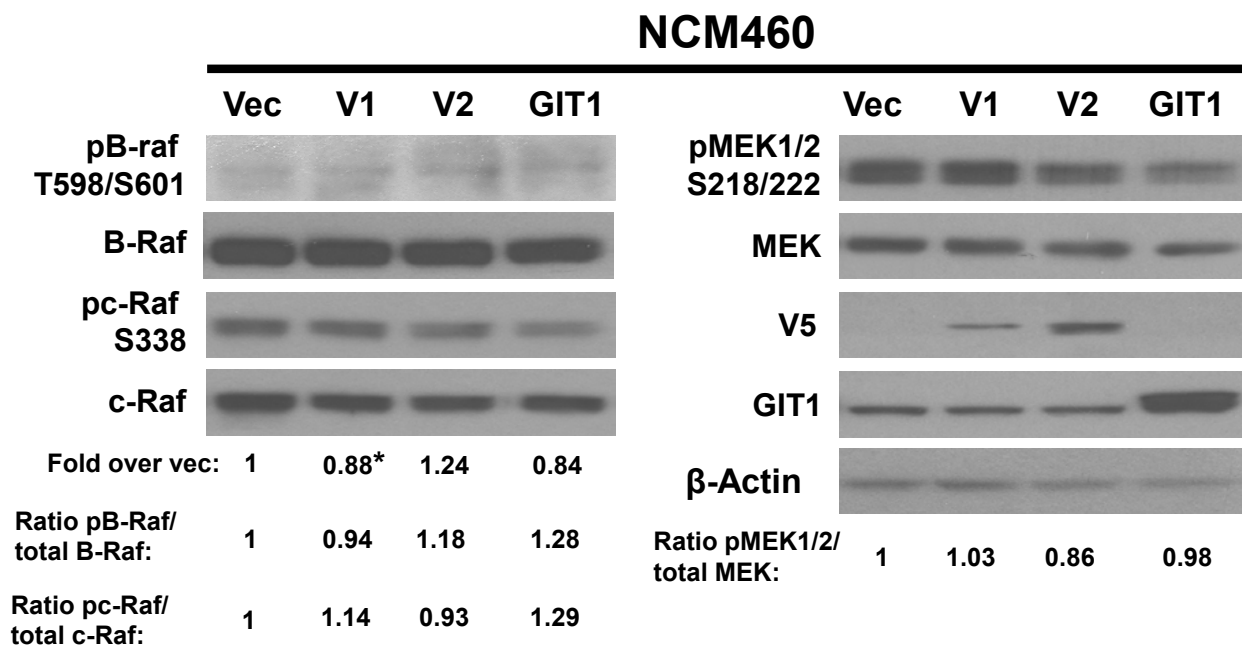**C**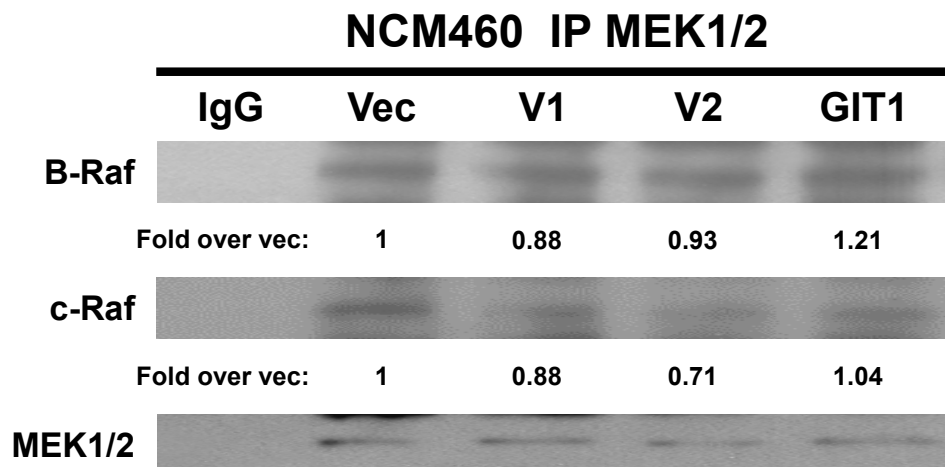

Supplement: mmc1.pdf [file mmc1.pdf]

**A** MAT2B V1, V2 and GIT1 mRNA expression

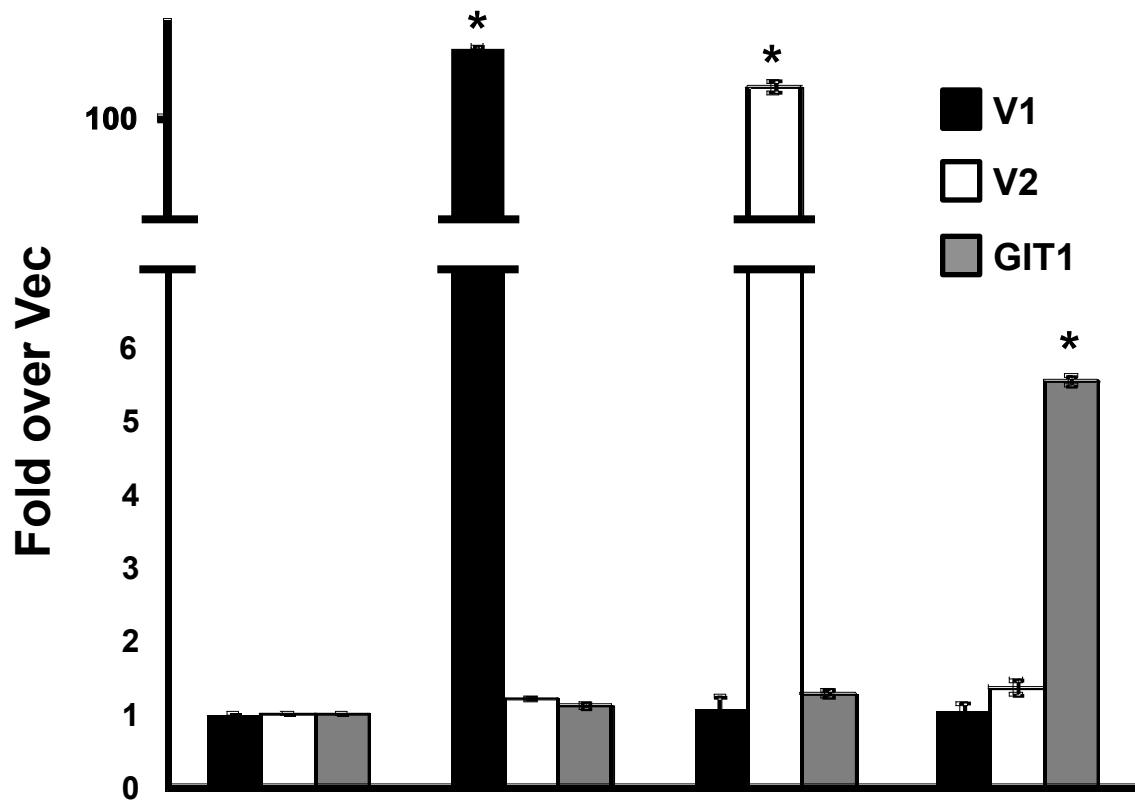

**B**

c-Raf mRNA expression

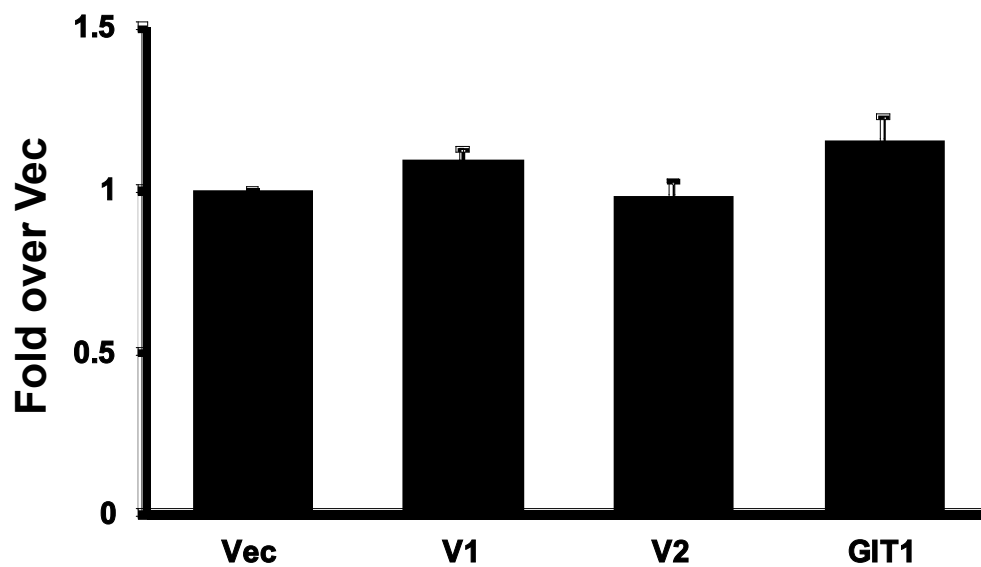

Supplement: mmc2.pdf [file mmc2.pdf]

**A**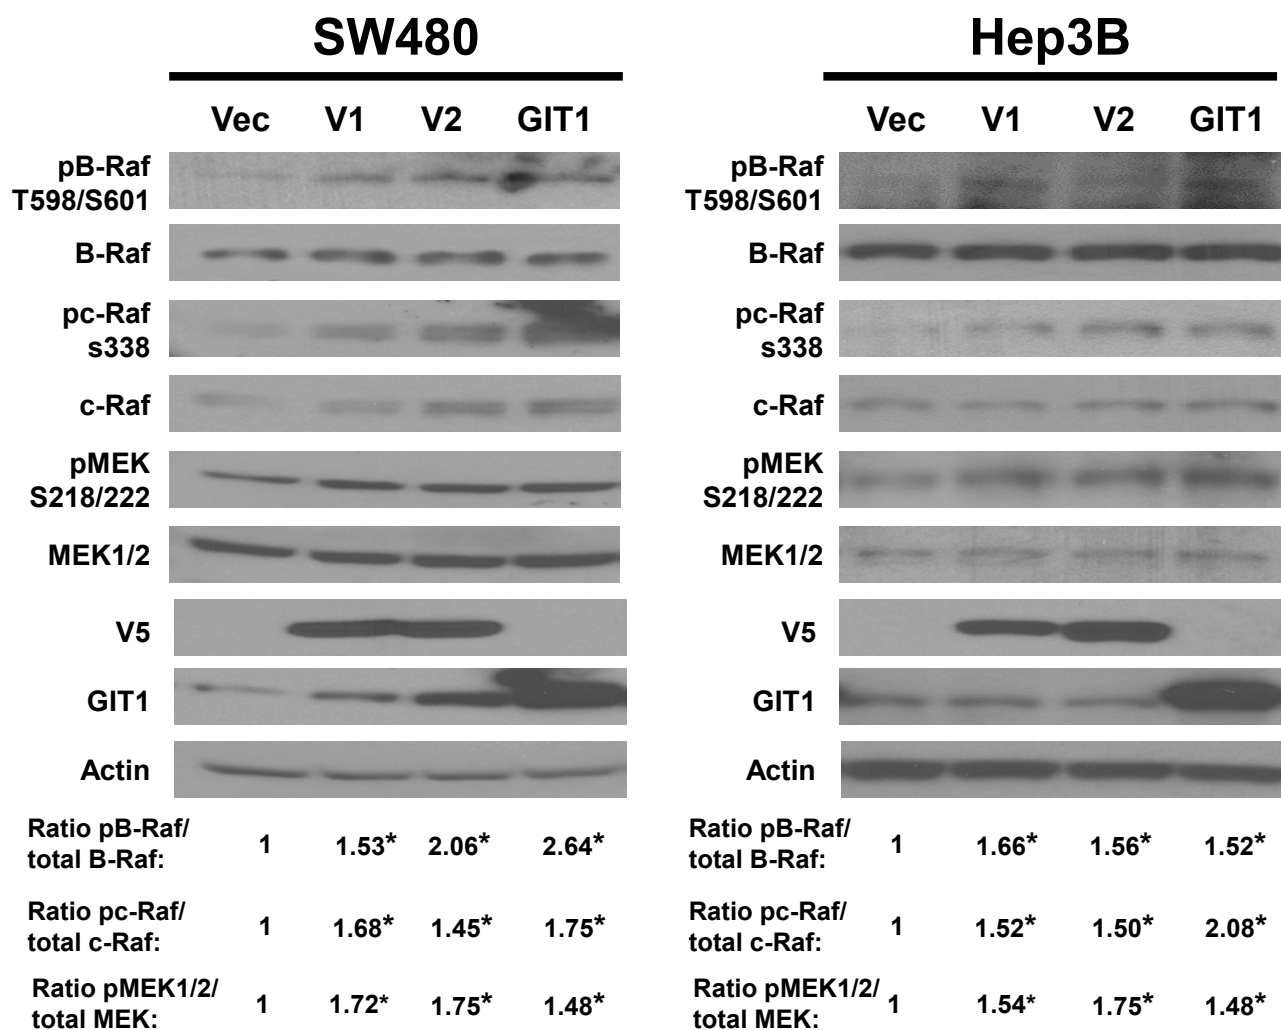**B**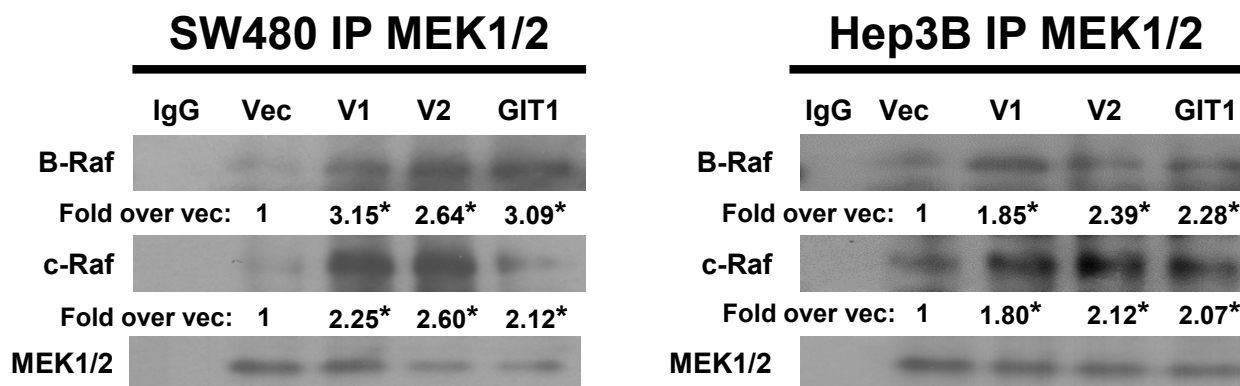

Supplement: mmc3.pdf [file mmc3.pdf]

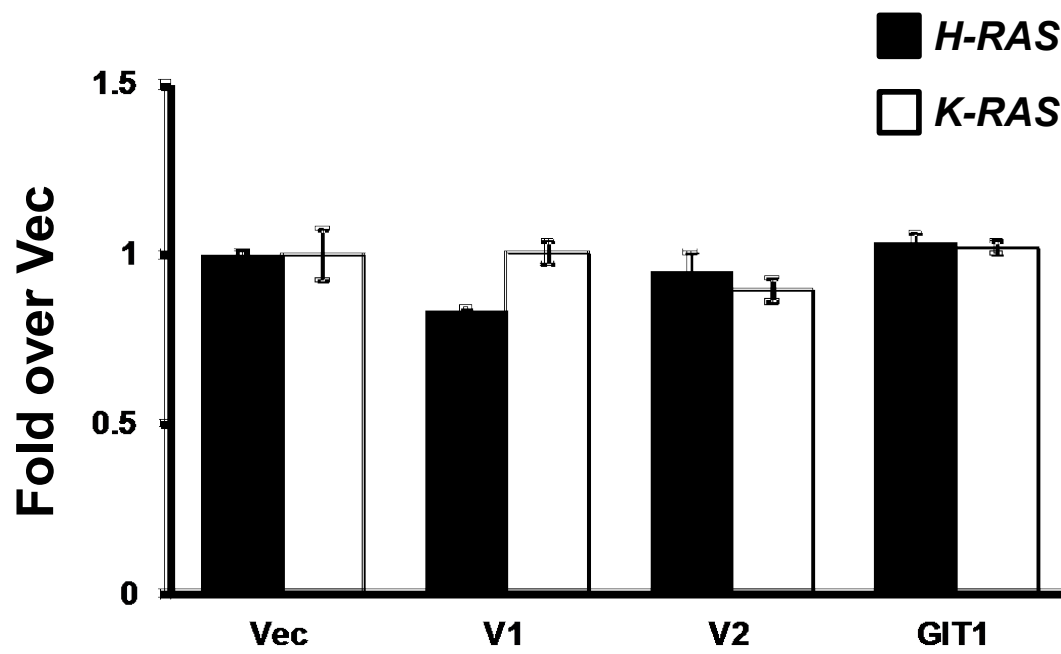

Supplement: mmc4.pdf [file mmc4.pdf]
